# Supplementary material
Source: PubMed Central journal article supplement (PMC6768774)
Supplement: supp_7.3.E568_2019-0040-original-submission.pdf [file supp_7.3.E568_2019-0040-original-submission.pdf]

1  
2  
3 Prevalence of chronic kidney disease and cardiovascular comorbidities in adults in 31 remote  
4 First Nations communities in Northwest Ontario.  
5  
6  
7

8 Len Kelly, Cai-lei Matsumoto, Yoko Schreiber, Janet Gordon, Hannah Willms, Christopher  
9 Olivier, Sharen Madden, Josh Hopko, Sheldon W. Tobe.  
10  
11

## 12 13 Introduction 14

15 Chronic kidney disease (CKD) is a precursor to end stage renal disease (ESRD) with its  
16 significant effects on mortality, quality of life of those affected, their families, and cost to  
17 Canada's universal health care system (1-3). Indigenous Canadians experience a high burden of  
18 CKD (4-6). Recent screening in Canadian First Nations communities suggest an adult estimate  
19 up to 30%. (4-7).  
20  
21

22 Comorbid cardiovascular conditions often accompany CKD. Diabetes, hypertension and  
23 dyslipidemia are more prevalent in Indigenous populations, contributing to cardiovascular  
24 disease (CVD) the leading cause of death in this population (8-13).  
25

26 Complications from these comorbidities are also more common. First Nations Canadians are  
27 more likely to go on to ESRD and CKD-related mortality is 77% higher (14-17). Presence of  
28 diabetes, a major risk for progressive CKD, is high in Indigenous populations, occurs at a  
29 younger age and is associated with increased mortality, cardiovascular disease and lower limb  
30 amputations (18- 20).  
31  
32

33 Hypertension can both initiate and result from CKD, creating a vicious cycle of progressive  
34 kidney damage, particularly with coexisting diabetes and dyslipidemia (21, 22). The increased  
35 CVD risk experienced by CKD patients is reduced with lipid-lowering strategies.  
36

37 In response to rising rates of ESRD and CKD, First Nations community chiefs in northwest  
38 Ontario requested a better understanding of the disease burden of CKD and related  
39 cardiovascular comorbidities. Knowing the prevalence of these conditions and clustering in  
40 individual patients is critical for effective management programs.  
41  
42

43 The purpose of this study is to document the prevalence of CKD and concurrent diabetes,  
44 hypertension, and dyslipidemia in a First Nations population in northwest Ontario.  
45  
46  
47

## 48 Methods 49

50 This observational study used retrospective clinical data from a regional electronic medical  
51 record (EMR) system over a three-year period, May 2014 to May 2017. The database included  
52 all community residents accessing provincially-funded medical services.  
53  
54  
55  
56  
57  
58  
59  
60

1  
2  
3 The setting was Northwest Ontario, where 31 remote First Nations communities are supported in  
4 primary care by the Sioux Lookout First Nations Health Authority (SLFNHA) which oversaw  
5 the study.  
6

7 Eligibility was confined to community members over 18 years. CKD was defined as estimated  
8 glomerular filtration rate (eGFR) < 60 ml/min per 1.73 m<sup>2</sup> or urine albuminuria creatinine ratio  
9 (ACR) ≥3 mg/mmol.  
10

11  
12 Demographic and laboratory data included: age, gender, medications, eGFR, ACR, low density  
13 lipoprotein cholesterol (LDL-C) and glycated hemoglobin (A1C). The most recent laboratory  
14 value was used to determine CKD. Patients with hypertension were identified by their use of  
15 antihypertensive medications. Patients with diabetes were identified by two criteria: A1c ≥ 6.5%  
16 or the use of a diabetic medication. Patients with dyslipidemia were identified by elevated low  
17 density lipoprotein cholesterol (LDL-C ≥ 2.0 mmol/L) or the use of lipid lowering medication  
18 (23).  
19

20  
21 Electronic data collection followed Canadian Primary Care Sentinel Surveillance Network  
22 methods. (24) The age adjusted CKD prevalence was calculated using the adult population as  
23 denominator. Comorbid prevalence of DM, HTN and DYS with CKD were calculated using the  
24 adult CKD population as denominator. Data is presented as the mean and standard deviation for  
25 continuous variables and proportions for discrete variables.  
26  
27

28 Ownership, control, access and possession of the research data (OCAP) was maintained by  
29 SLFNHA (25). Ethics approval was granted by the Sioux Lookout Meno Ya Win Research  
30 Review and Ethics Committee (#16-15) and the Lakehead University Research Ethics Board  
31 (#161 15-61).  
32  
33

## 34 35 36 Results

37  
38 There were 16,170 adults in this regional First Nations population of 24,787. Of these 5,224  
39 (32.2%) patient records had an eGFR and/or ACR testing recorded in the EMR over the 3-year  
40 period. (Table 1)  
41

42 Twenty eight percent of the adult population had at least one eGFR measurement (4,578/16,170)  
43 and 15% (2,462/16,170) at least one ACR with overlap between these two groups. Abnormal  
44 results occurred in 18% (806/4,578) of eGFR and 58% (1,433/2,462) of ACR tests. The  
45 resulting age-adjusted CKD prevalence in the adult population (1,859) was 14.7%, with a mean  
46 age of 55, fourteen years older than the average adult. Fifty-six percent (2,945/5,224) of those  
47 tested were female and they had an equivalent prevalence of CKD (54.4%; 1,021/1,859). (Table  
48 1)  
49  
50

51  
52 The age adjusted prevalence of advanced CKD (stage 3-5), with decreased renal function (eGFR  
53 <60), was 7.0% while albuminuria-related CKD (stage 1-2) was 7.7%. (Table 2)  
54  
55  
56  
57  
58  
59  
60

**Table 1. Demographics of total 18+ population, population with renal testing**

|                        | N (%)         | F (%)        | Age (SD)  |
|------------------------|---------------|--------------|-----------|
| Adult population (18+) | 16,170        | 8,048 (50.0) | 41 ± 16.9 |
| Tested population      | 5,224 (32.3%) | 2,945 (56.4) | 50 ± 16.0 |

**Table 2. Age-adjusted CKD prevalence**

|               | Number | Age adjusted prevalence |
|---------------|--------|-------------------------|
| Stage 1-2     | 1,053  | 7.7%                    |
| Stage 3-5 CKD | 806    | 7.0%                    |
| TOTAL CKD     | 1,859  | 14.7%                   |

CKD was diagnosed in 1,053 patients with albuminuria alone (stage 1,2). Patients with renal function decline (eGFR < 60 ml/min per 1.73m<sup>2</sup>) included 592 stage 3 (30- 60), 149 stage 4 (15-30) and 65 stage 5 patients (<15). (Table 1)

Eighty percent of CKD patients had at least one cardiovascular comorbidity (diabetes, hypertension or dyslipidemia) and 39% had all three. Diabetes was most often co-prevalent (72%) followed by dyslipidemia (71%) and hypertension (59%). (Table 3, Figure 1)

Of the 58% of CKD patients with two cardiovascular comorbidities, 47% had diabetes and hypertension, 58% had diabetes and dyslipidemia, and 49% had hypertension and dyslipidemia. (Table 4).

**Table 3. Characteristics of CKD population**

| <i>Characteristic</i>       | <i>CKD Population, n= 1,859</i> |
|-----------------------------|---------------------------------|
| <i>eGFR n, (%)</i>          |                                 |
| <i>not tested</i>           | <i>299 (16)</i>                 |
| <i>≥60</i>                  | <i>754 (41)</i>                 |
| <i>30-59</i>                | <i>592 (32)</i>                 |
| <i>15-29</i>                | <i>149 (8)</i>                  |
| <i>&lt;15</i>               | <i>65 (4)</i>                   |
| <i>ACR n, (%)</i>           |                                 |
| <i>not tested</i>           | <i>357 (19)</i>                 |
| <i>&lt;3</i>                | <i>69 (4)</i>                   |
| <i>3-300</i>                | <i>936 (50)</i>                 |
| <i>&gt;300</i>              | <i>497 (27)</i>                 |
| <i>Comorbidities</i>        |                                 |
| <i>Diabetes, n (%)</i>      | <i>1,332 (72)</i>               |
| <i>Hypertension, n (%)</i>  | <i>1,098 (59)</i>               |
| <i>Dyslipidemia, n (%)</i>  | <i>1,313 (71)</i>               |
| <i>Average A1c</i>          | <i>8.3</i>                      |
| <i>Average LDL</i>          | <i>2.1</i>                      |
| <i>LDL &lt;2.0</i>          | <i>688 (37)</i>                 |
| <i>Statin Rx, n (%)</i>     | <i>980 (53)</i>                 |
| <i>ACE-I/ARB* Rx, n (%)</i> | <i>619 (33)</i>                 |

\*ACE-I/ARB: Angiotensin converting enzyme inhibitors/Angiotensin receptor blocker

**Table 4. Prevalence of multiple comorbidities in CKD population**

|                                       |            |
|---------------------------------------|------------|
| Total CKD n, (%)                      | 1859 (100) |
| CKD + 3 comorbidities<br>DM, HTN, DYS | 716 (39)   |
| CKD + 2 comorbidities                 | 1,078 (58) |
| DM, HTN                               | 877 (47)   |
| DM, DYS                               | 1,069 (58) |
| HTN, DYS                              | 852 (49)   |

DM = diabetes mellitus, HTN = hypertension, DYS = dyslipidemia

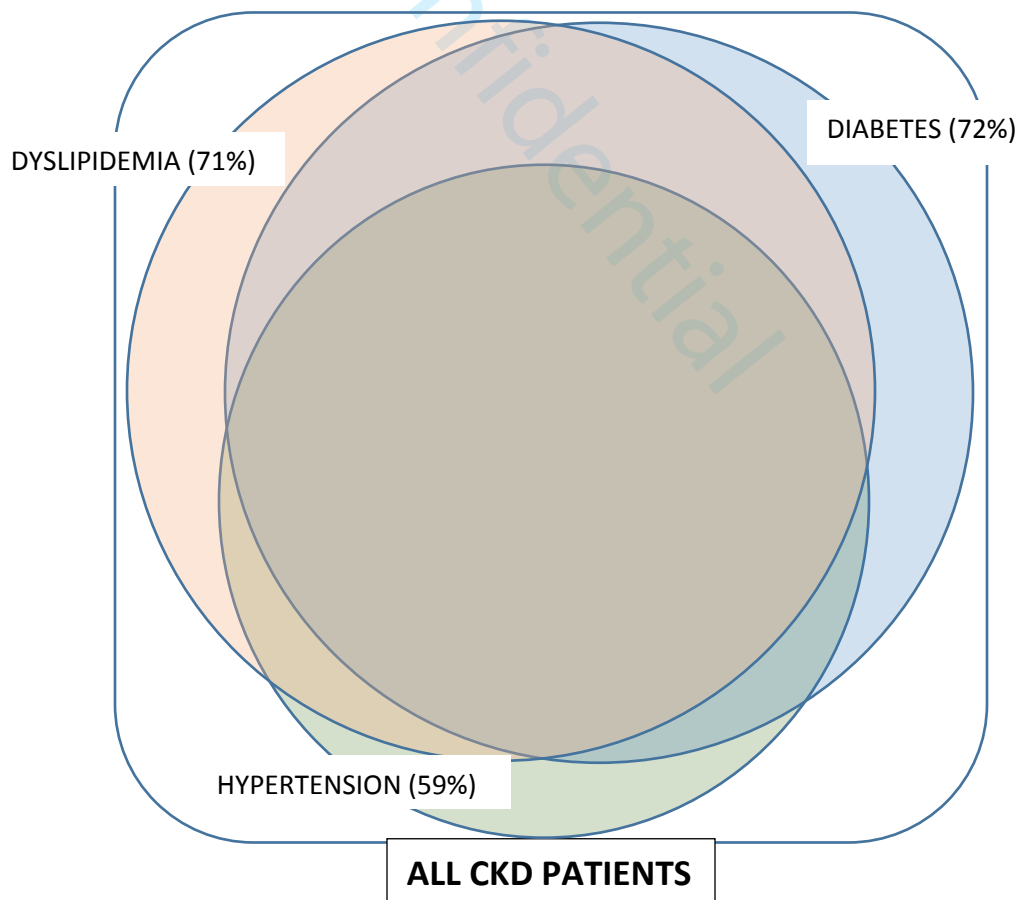

Figure 1. Comorbidities in CKD patients

## Discussion

This is the first study assessing the prevalence of CKD and cardiovascular comorbidities in the First Nations population of northwest Ontario. At 14.7%, our age-adjusted prevalence of CKD is higher than the estimated Canadian prevalence of 12.5% (5) but lower than recent screening reported from other Canadian First Nations communities of 25% (6, 7). This is likely due to limited ACR testing. Fifteen percent of the population had ACR testing, which often detected (68%) CKD. Early stage CKD constitutes most cases detected in screening studies, without robust ACR testing, our study likely underestimates total CKD prevalence.

Testing with eGFR was more common (28%) with a lower yield of abnormal results (18%). Despite limited testing, our prevalence of advanced stage CKD of 7.0% is more than double that of the Canadian population (3.1%) and Manitoba First Nations (3.3%) and higher than southern Ontario First Nations (4.9%). (6, 7) Since patients with advanced CKD (eGFR<60) carry the highest risk for cardiovascular disease and progression to ESRD, these results are concerning. (26, 27)

Women constituted 56.4% of the tested population; CKD was detected in 55.4%, similar to estimates in the general Canadian population (5).

### *Diabetes*

Since diabetes is highly prevalent in First Nations populations and the leading cause of end stage renal disease (ESRD), a high (72%) co-prevalence of CKD and DM is not surprising. (28-30) (Table 3) This is higher than Komenda's Manitoba screening study, where 60% of CKD patients also had diabetes (6). Gao's retrospective study of medical records of Alberta First Nations patients with advanced CKD (eGFR<60) also identified (42%) comorbid diabetes (14).

### *Dyslipidemia*

In this CKD cohort, 71% had coexisting dyslipidemia. (Table 3) The co-prevalence of dyslipidemia in First Nations adults (without CKD) has been estimated at 32% (10, 11) The general Canadian population prevalence is estimated at 14-36% (31).

The 2016 CCS guidelines for the management of dyslipidemia now includes CKD as 'high risk' for cardiovascular disease, with an indication for statin therapy to lower the LDL-C to < 2 mmol/L, the benchmark used in our study (13). The average LDL-C value in CKD patients was 2.1mmol/L, lower than the average of 2.43 mmol/L observed in the 2012 national CIRCLE study of 885 First Nations people with diabetes (4).

Almost one third (29 %) of the study cohort was not screened for lipids during the 3-year study period. Only 53% of patients with CKD in our study were receiving a statin and only 37% met the recommended LDL goal.

### *Hypertension*

We found a 59% co-prevalence of HTN and CKD, higher than the 27% identified in the 2016 Manitoba study (6). Ashton's 2011 study of 555 First Nations community members in southern Ontario, found a 29.5% prevalence of HTN and CKD but co-prevalence was not determined (7).

Only 56% (619/1,098) of our CKD patients with hypertension were receiving treatment with ACE-I/ARBs. This represents suboptimal utilization considering Diabetes Canada and Kidney Disease: Improving Global Working Group (KDIGO) recommendations (31, 32).

### *Multiple Cardiovascular risk factors*

The prevalence of other chronic diseases with CKD confers additional CVD risk. A significant cohort of CKD patients (39%) suffered all three cardiovascular comorbidities. (Table 4, Figure 1) The 2012 Circle study noted progression from albuminuria to advanced CKD was associated with duration of diabetes and co-prevalence with hypertension and dyslipidemia in First Nations patients (4).

While only a small proportion (<1%) of patients with CKD progress to ESRD, their risk of all-cause and cardiovascular mortality is at least ten-fold higher (33). The higher rate of CKD in Indigenous Canadians is an important signal of the need for assessment of comorbidities for CVD risk management (14, 26).

Diabetes and hypertension both affect renal function and our study found both present in 47% of CKD patients. This contrasts with the 20% (9/45) of patients identified with advanced CKD (eGFR<60) and HTN and DM in the 2017 Manitoba study (6).

### Limitations

Our study has limitations because of the real-world nature of the data, with relevant testing of only 32% of the population. This cohort may not be representative of the total adult population, as higher risk patients were more likely to both seek medical attention and receive renal function testing. Comparing results to universal screening studies is also problematic. Screening studies include many well, volunteer subjects, while our participants were actively undergoing treatment or clinical investigation, with limited well-person screening. Studies also used a variety of denominators in calculating prevalence: the screened population (6,7) or sampling which excluded Indigenous or rural communities (5) or the total adult population, used in this and Gao's Alberta study (14) Our noted prevalence of CKD is likely an underestimation when compared to screening studies with universal ACR and eGFR testing (6,7). ACR urine testing gives the highest yield of CKD detection but is not universally used in general practice and was ordered in only 13% of the adult population. Urine screening at point of care testing (dipstick) is commonly used but not systematically recorded in this EMR (available in clinical notes only). Our study is therefore limited in providing an estimate of overall CKD, but the high prevalence of advanced CKD in this population is notable, with only 28.3% having eGFR testing.

1  
2  
3  
4  
5  
6  
7 Interpretation  
8

9 We document a high prevalence of advanced CKD and associated cardiovascular comorbidities  
10 in this First Nations population. Co-prevalence of these major chronic diseases in this population  
11 increases cardiovascular risk and robust assessment is warranted. These findings will help health  
12 care providers identify people at high risk for cardiovascular disease and progressive kidney  
13 disease.  
14  
15  
16  
17  
18  
19  
20  
21  
22  
23  
24  
25  
26  
27  
28  
29  
30  
31  
32  
33  
34  
35  
36  
37  
38  
39  
40  
41  
42  
43  
44  
45  
46  
47

Confidential

48 References  
49  
50

- 51 1. Neovius M, Jacobson SH, Eriksson JK, Elinder C-G, Hylander B. Mortality in chronic  
52 kidney disease and renal replacement therapy: a population-based cohort study. *BMJ open*.  
53 2014;4(2):e004251.  
54 2. Zelmer J. The economic burden of end-stage renal disease in Canada. *Kidney*  
55 *international*. 2007;72(9):1122-9.  
56  
57  
58  
59  
60



3. Finnegan-John J, Thomas VJ. The psychosocial experience of patients with end-stage renal disease and its impact on quality of life: findings from a needs assessment to shape a service. *ISRN nephrology*. 2012;2013.
4. Dyck RF, Hayward MN, Harris SB. Prevalence, determinants and co-morbidities of chronic kidney disease among First Nations adults with diabetes: results from the CIRCLE study. *BMC Nephrol*. 2012;13:57.
5. Arora P, Vasa P, Brenner D, Iglar K, McFarlane P, Morrison H, et al. Prevalence estimates of chronic kidney disease in Canada: results of a nationally representative survey. *Canadian Medical Association Journal*. 2013;cmaj. 120833.
6. Komenda P, Lavalley B, Ferguson TW, Tangri N, Chartrand C, McLeod L, et al. The prevalence of CKD in rural Canadian indigenous peoples: results from the First Nations Community Based Screening to Improve Kidney Health and Prevent Dialysis (FINISHED) screen, triage, and treat program. *American Journal of Kidney Diseases*. 2016;68(4):582-90.
7. Ashton C, Duffie D. Chronic kidney disease in Canada's First Nations: results of an effective cross-cultural collaboration. *Healthcare quarterly (Toronto, Ont)*. 2011;14(3):42-7.
8. Anand SS, Yusuf S, Jacobs R, Davis AD, Yi Q, Gerstein H, et al. Risk factors, atherosclerosis, and cardiovascular disease among Aboriginal people in Canada: the Study of Health Assessment and Risk Evaluation in Aboriginal Peoples (SHARE-AP). *Lancet*. 2001;358(9288):1147-53.
9. Johnson JA, Vermeulen SU, Toth EL, Hemmelgarn BR, Ralph-Campbell K, Hugel G, et al. Increasing incidence and prevalence of diabetes among the Status Aboriginal population in urban and rural Alberta, 1995-2006. *Canadian Journal of Public Health/Revue Canadienne de Sante'e Publique*. 2009:231-6.
10. Bruce SG, Riediger ND, Zacharias JM, Young TK. Obesity and obesity-related comorbidities in a Canadian First Nation population. *Chronic Diseases and Injuries in Canada*. 2010;31(1).
11. Riediger N, Bruce S, Young T. Cardiovascular risk according to plasma apolipoprotein and lipid profiles in a Canadian First Nation. *Chronic diseases in Canada*. 2010;31(1):33-8.
12. Anand SS, Yi Q, Gerstein H, Lonn E, Jacobs R, Vuksan V, et al. Relationship of metabolic syndrome and fibrinolytic dysfunction to cardiovascular disease. *Circulation*. 2003;108(4):420-5.
13. Anderson TJ, Gregoire J, Pearson GJ, Barry AR, Couture P, Dawes M, et al. 2016 Canadian Cardiovascular Society Guidelines for the Management of Dyslipidemia for the Prevention of Cardiovascular Disease in the Adult. *Can J Cardiol*. 2016;32(11):1263-82.
14. Gao S, Manns BJ, Culleton BF, Tonelli M, Quan H, Crowshoe L, et al. Access to health care among status Aboriginal people with chronic kidney disease. *Canadian Medical Association Journal*. 2008;179(10):1007-12.
15. Dyck RF, Jiang Y, Osgood ND. The Long-Term Risks of End Stage Renal Disease and Mortality among First Nations and Non-First Nations People with Youth-Onset Diabetes. *Can J Diabetes*. 2014.
16. Dyck RF, Sidhu N, Klomp H, Cascagnette PJ, Teare GF. Differences in glycemic control and survival predict higher ESRD rates in diabetic First Nations adults. *Clin Invest Med*. 2010;33(6):E390-E7.
17. Tobe SW, Pylypchuk G, Wentworth J, Kiss A, Szalai JP, Perkins N, et al. Effect of nurse-directed hypertension treatment among First Nations people with existing hypertension

- 1  
2  
3 and diabetes mellitus: the Diabetes Risk Evaluation and Microalbuminuria (DREAM 3)  
4 randomized controlled trial. *Canadian Medical Association Journal*. 2006;174(9):1267-71.
- 5 18. Young TK, Reading J, Elias B, O'Neil JD. Type 2 diabetes mellitus in Canada's first  
6 nations: status of an epidemic in progress. *CMAJ*. 2000;163(5):561-6.
- 7 19. Loewen K, Jordan Vigliarolo CPA C, Lance B, Rockley M, Yoko Schreiber M, Catherine  
8 Kivi R, et al. Rates of diabetes-related lower-limb amputation in northwestern Ontario: an  
9 incidence study and introduction of a standardized diabetic foot ulcer management protocol.  
10 *Canadian Journal of Rural Medicine*. 2017;22(3):100.
- 11 20. Oster RT, Johnson JA, Hemmelgarn BR, King M, Balko SU, Svenson LW, et al. Recent  
12 epidemiologic trends of diabetes mellitus among status Aboriginal adults. *Canadian Medical*  
13 *Association Journal*. 2011;183(12):E803-E8.
- 14 21. El Nahas AM, Bello AK. Chronic kidney disease: the global challenge. *The Lancet*.  
15 2005;365(9456):331-40.
- 16 22. Baigent C, Blackwell L, Emberson J, Holland LE, Reith C, Bhala N, et al. Efficacy and  
17 safety of more intensive lowering of LDL cholesterol: a meta-analysis of data from 170,000  
18 participants in 26 randomised trials. *Lancet*. 2010;376(9753):1670-81.
- 19 23. Anderson TJ, Grégoire J, Pearson GJ, Barry AR, Couture P, Dawes M, et al. 2016  
20 Canadian Cardiovascular Society guidelines for the management of dyslipidemia for the  
21 prevention of cardiovascular disease in the adult. *Canadian Journal of Cardiology*.  
22 2016;32(11):1263-82.
- 23 24. Williamson, T., et. al., CPCSSN Disease Definitions: Canadian Primary Care Sentinel  
24 Surveillance Network (CPCSSN). June 15, 2014. URL: <http://cpcssn.ca/research-resources/case-definitions>  
25
- 26 25. First Nations C. OCAP: Ownership, Control, Access and Possession. National Aboriginal  
27 Health Organization. 2007:1-23.
- 28 26. Hemmelgarn BR, Manns BJ, Lloyd A, James MT, Klarenbach S, Quinn RR, et al.  
29 Relation between kidney function, proteinuria, and adverse outcomes. *JAMA*. 2010;303(5):423-  
30 9.
- 31 27. Said S, Hernandez GT. The link between chronic kidney disease and cardiovascular  
32 disease. *Journal of nephropathology*. 2014;3(3):99.
- 33 28. Naqshbandi M, Harris SB, Esler JG, Antwi-Nsiah F. Global complication rates of type 2  
34 diabetes in Indigenous peoples: A comprehensive review. *Diabetes Res Clin Pract*. 2008;82(1):1-  
35 17.
- 36 29. Hayward MN, Harris SB, Esler J, Caruso R, Thind A, Hanley AJ, et al. Results of a Pilot  
37 National Diabetes Surveillance System for First Nations. *Canadian Journal of Diabetes*.  
38 2012;36(5):S21.
- 39 30. Lea JP, Nicholas SB. Diabetes mellitus and hypertension: key risk factors for kidney  
40 disease. *Journal of the National Medical Association*. 2002;94(8 Suppl):7S.
- 41 31. Tobe SW, Gilbert RE, Jones C, Leiter LA, Prebtani AP, Woo V, et al. Treatment of  
42 Hypertension. *Canadian journal of diabetes*. 2018;42:S186-S9.
- 43 32. Ruzicka M, Quinn RR, McFarlane P, Hemmelgarn B, Prasad GVR, Feber J, et al.  
44 Canadian Society of Nephrology commentary on the 2012 KDIGO clinical practice guideline for  
45 the management of blood pressure in CKD. *American Journal of Kidney Diseases*.  
46 2014;63(6):869-87.
- 47  
48  
49  
50  
51  
52  
53  
54  
55  
56  
57  
58  
59  
60

1  
2  
3 33. Stringer S, Sharma P, Dutton M, Jesky M, Ng K, Kaur O, et al. The natural history of,  
4 and risk factors for, progressive chronic kidney disease (CKD): the Renal Impairment in  
5 Secondary care (RIISC) study; rationale and protocol. BMC nephrology. 2013;14(1):95.  
6  
7  
8  
9  
10  
11  
12  
13  
14  
15  
16  
17  
18  
19  
20  
21  
22  
23  
24  
25  
26  
27  
28  
29  
30  
31  
32  
33  
34  
35  
36  
37  
38  
39  
40  
41  
42  
43  
44  
45  
46  
47  
48  
49  
50  
51  
52  
53  
54  
55  
56  
57  
58  
59  
60

Confidential
